# Supplementary material for: CBXs-related prognostic gene signature correlates with immune microenvironment in gastric cancer
Source: publisher site journal article supplement (doi:10.18632/aging.204214), 2022-08-14
Supplement: Supplementary file [file aging-v14i15-204214-supplementary-material-SD1.pdf]

**SUPPLEMENTARY FIGURES**

|                             | CBX1              | CBX2              | CBX3              | CBX4              | CBX5              | CBX6              | CBX7              | CBX8              |
|-----------------------------|-------------------|-------------------|-------------------|-------------------|-------------------|-------------------|-------------------|-------------------|
| Analysis Type by Cancer     | Cancer vs. Normal | Cancer vs. Normal | Cancer vs. Normal | Cancer vs. Normal | Cancer vs. Normal | Cancer vs. Normal | Cancer vs. Normal | Cancer vs. Normal |
| Bladder Cancer              | 2                 | 2                 | 2                 | 1                 |                   | 1                 |                   |                   |
| Brain and CNS Cancer        | 2                 | 2 1               | 11                | 1                 | 5 1               | 11                | 1 8               | 1                 |
| Breast Cancer               | 1                 | 6 1               | 15                | 6                 | 2                 | 2                 | 1 17              | 4                 |
| Cervical Cancer             | 1                 | 1                 | 4                 |                   | 4                 |                   | 1                 |                   |
| Colorectal Cancer           | 6                 | 10                | 24                | 18                | 10                | 4                 | 12                | 6                 |
| Esophageal Cancer           | 2 1               |                   | 4                 |                   |                   | 1                 | 1                 |                   |
| Gastric Cancer              | 5                 | 3                 | 4                 | 6                 |                   | 1                 | 1                 |                   |
| Head and Neck Cancer        | 4 1               | 2                 | 13                |                   | 2                 |                   | 1                 |                   |
| Kidney Cancer               |                   |                   | 7                 | 1                 |                   |                   | 1                 | 1                 |
| Leukemia                    | 1 3               | 5                 | 1 1               | 2                 | 3 4               | 3                 | 1 7               |                   |
| Liver Cancer                | 4                 |                   | 2                 |                   | 1                 |                   | 1                 |                   |
| Lung Cancer                 | 9                 | 3                 | 11                | 2                 | 5                 | 1                 | 7                 |                   |
| Lymphoma                    | 1                 | 1                 | 3 1               |                   | 5 2               | 4 1               |                   |                   |
| Melanoma                    |                   |                   | 3                 |                   |                   |                   | 1                 |                   |
| Myeloma                     |                   |                   | 1                 |                   |                   |                   |                   | 1                 |
| Other Cancer                | 3 1               | 3                 | 4                 | 2                 | 5 1               |                   | 3                 | 1                 |
| Ovarian Cancer              |                   |                   | 2                 |                   |                   | 1                 | 5                 |                   |
| Pancreatic Cancer           | 1                 |                   | 1                 |                   | 2                 |                   |                   |                   |
| Prostate Cancer             |                   |                   | 3                 | 4                 |                   | 1                 | 2                 |                   |
| Sarcoma                     | 8                 |                   | 9                 | 1                 | 6                 | 2                 | 7                 |                   |
| Significant Unique Analyses | 49 7              | 37 3              | 123 1             | 42 7              | 50 11             | 8 24              | 3 77              | 13 1              |
| Total Unique Analyses       | 348               | 273               | 361               | 327               | 357               | 298               | 257               | 243               |

**Supplementary Figure 1. Transcriptional expression comparison of CBXs in 20 different types of cancer diseases analyzed by ONCOMINE database.** mRNA level was compared by student's *t*-test. Threshold setting: *P*-value <0.01; fold change: 1.5; gene rank: 10%.

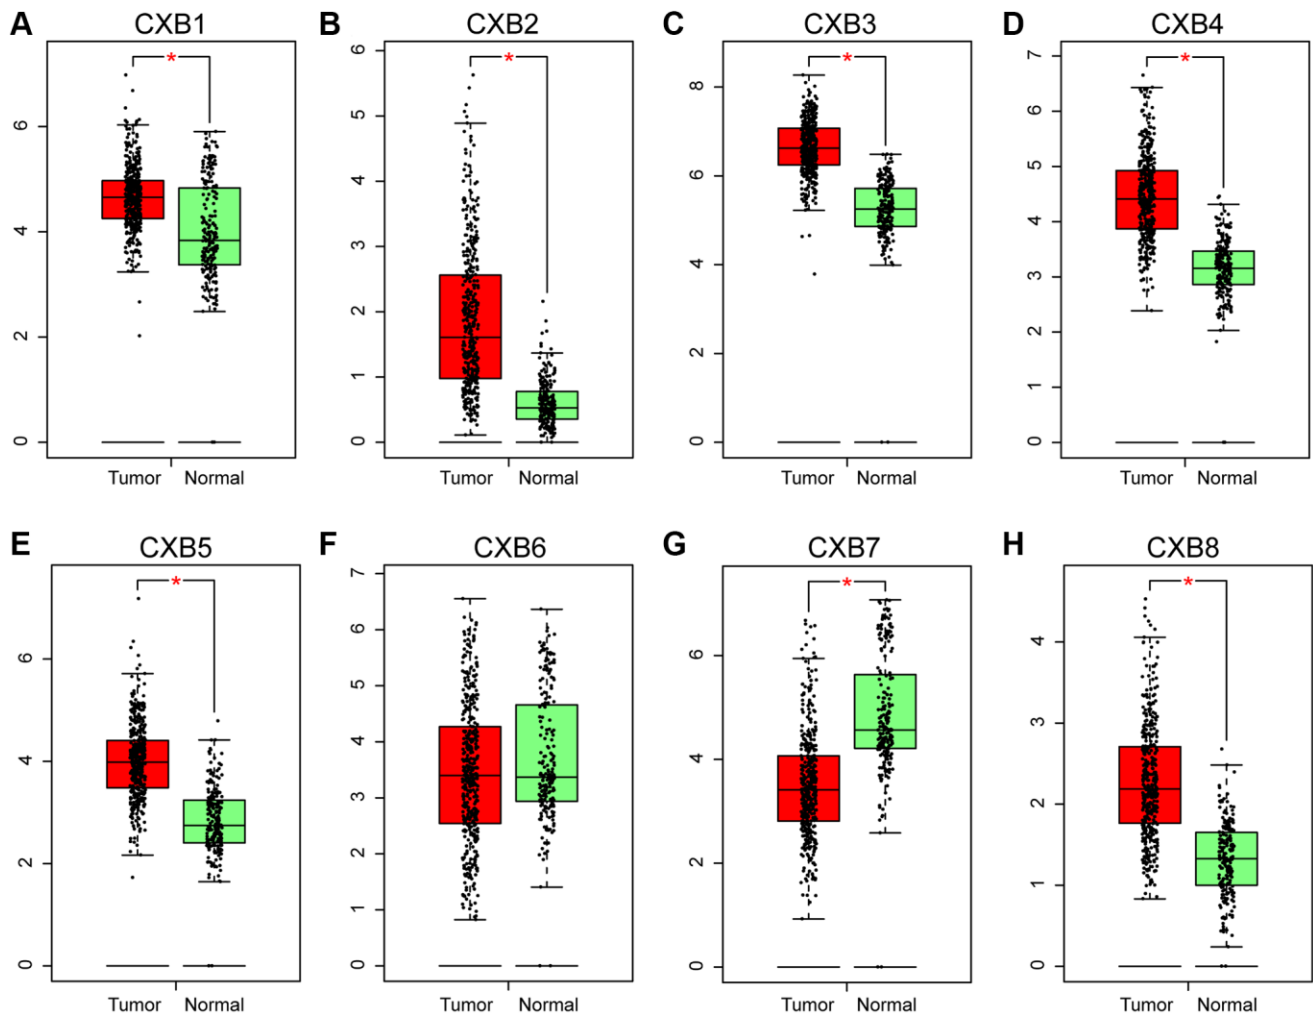

**Supplementary Figure 2. Comparison of the mRNA expression level of 8 CBXs family members in gastric cancer tissues and adjacent normal tissues analyzed by the GEPIA online database. (A) CBX1; (B) CBX2; (C) CBX3; (D) CBX4; (E) CBX5; (F) CBX6; (G) CBX7; (H) CBX8. \*P < 0.05.**

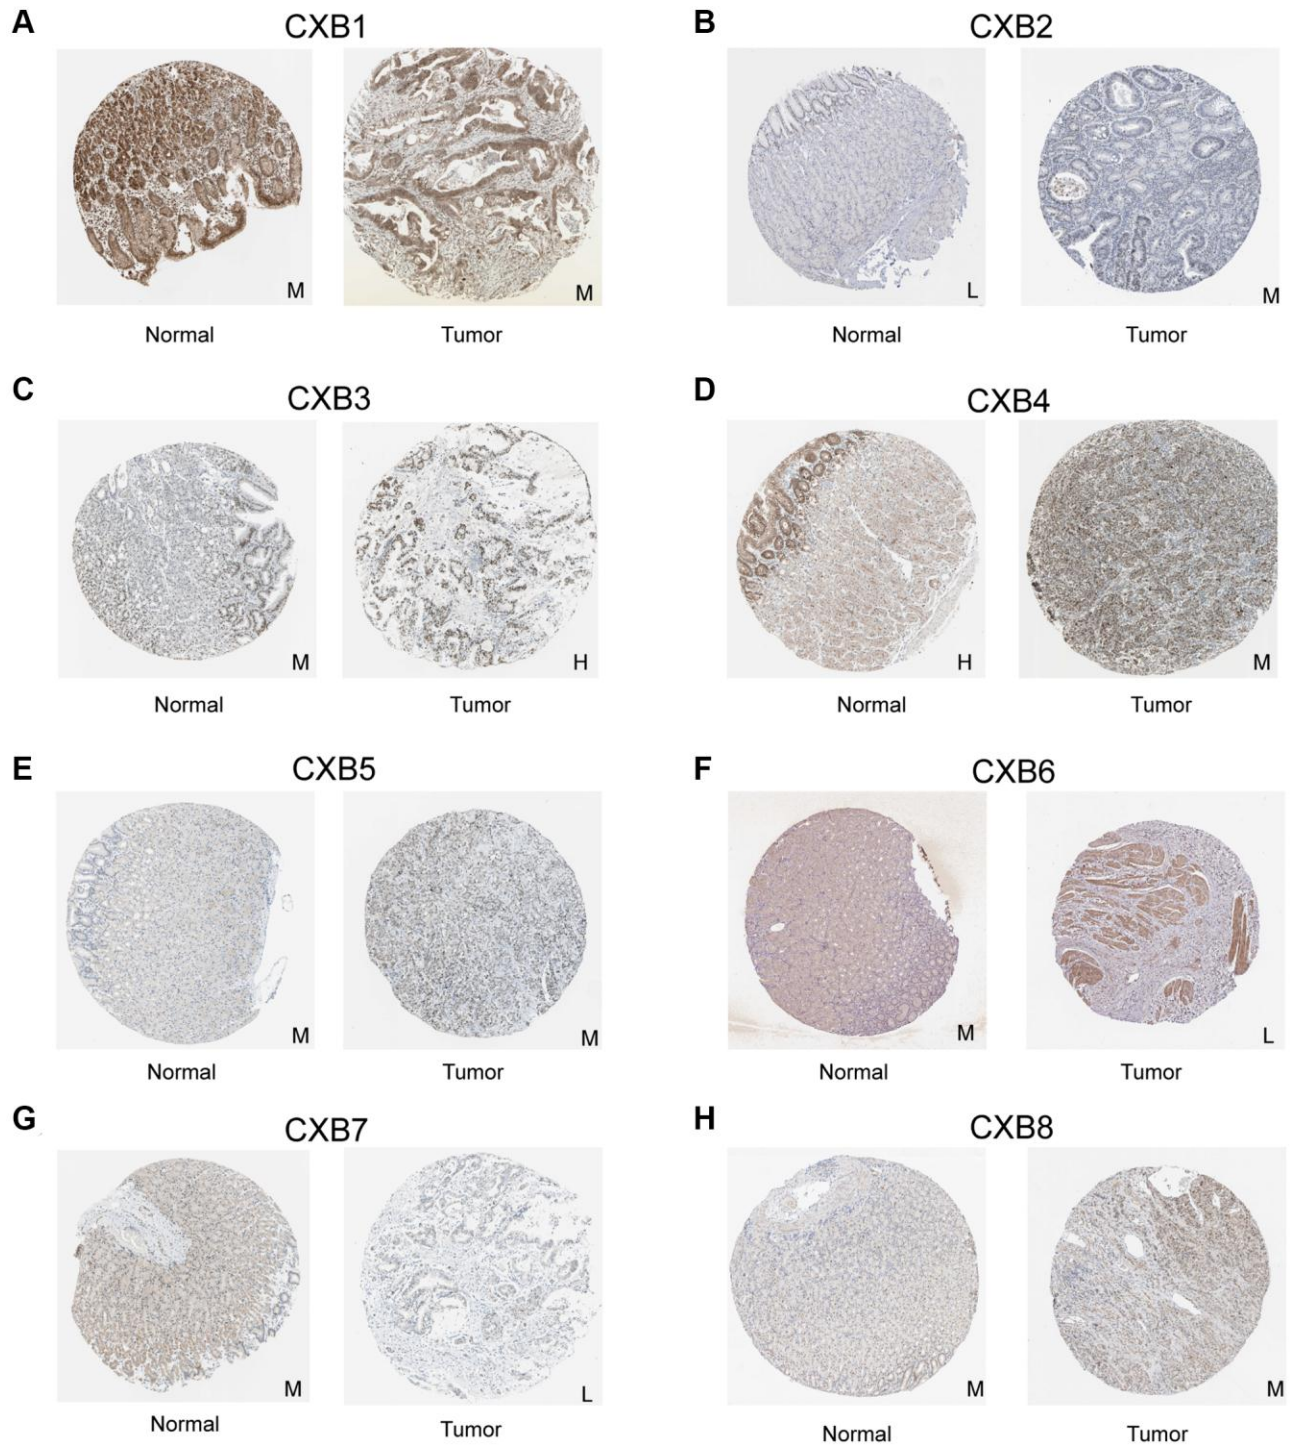

**Supplementary Figure 3. Representative immunohistochemistry images of *CBXs* family members in gastric cancer tissues and normal tissues using the human protein atlas database. (A) *CBX1*; (B) *CBX2*; (C) *CBX3*; (D) *CBX4*; (E) *CBX5*; (F) *CBX6*; (G) *CBX7*; (H) *CBX8*. Abbreviations: L: low expression; M: middle expression; H: high expression.**

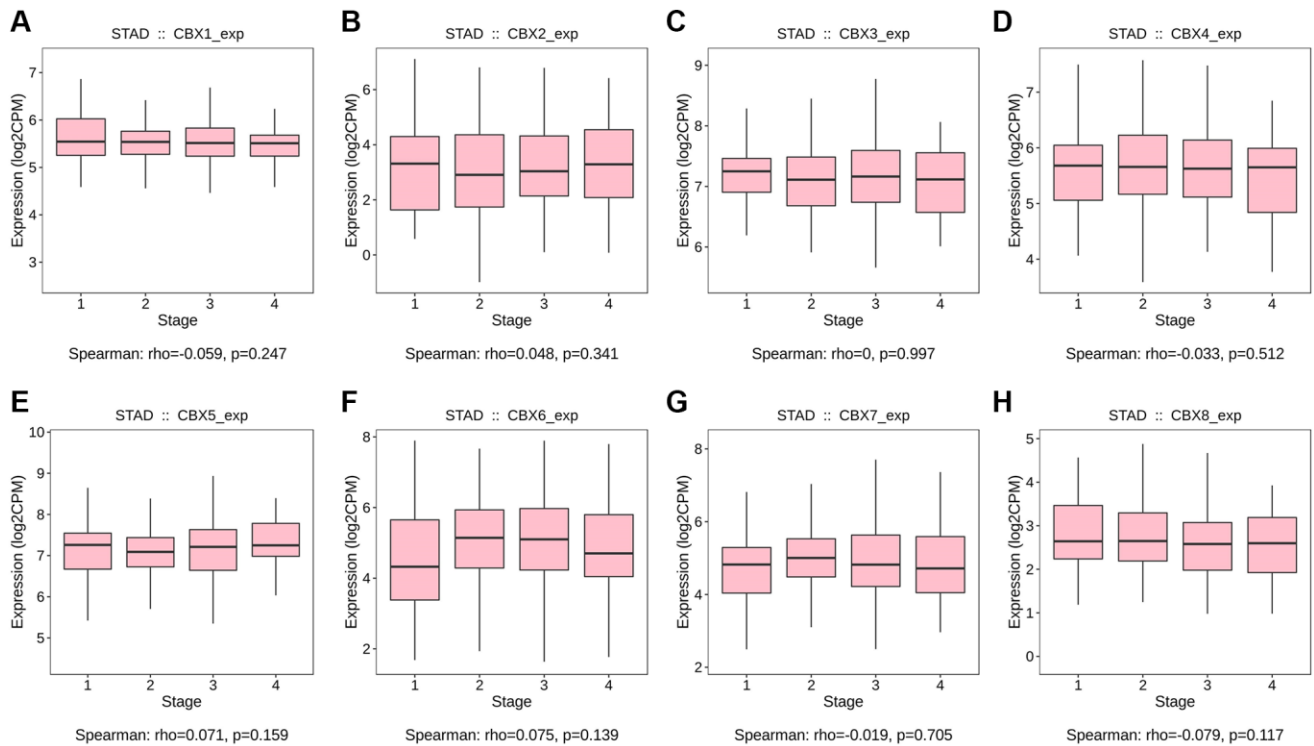

**Supplementary Figure 4. Spearman's correlation analysis of the *CBXs* expression and clinical stages in gastric cancer via the TISIDB database. (A) *CBX1*; (B) *CBX2*; (C) *CBX3*; (D) *CBX4*; (E) *CBX5*; (F) *CBX6*; (G) *CBX7*; (H) *CBX8*.**

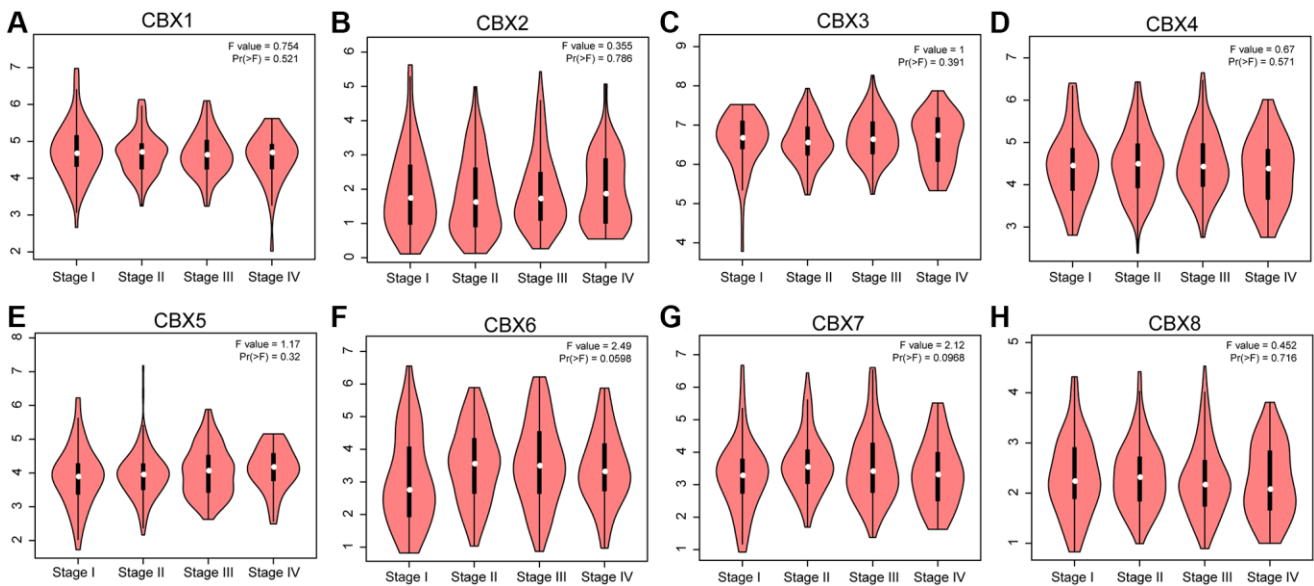

**Supplementary Figure 5. Correlation between mRNA expression of *CBXs* family members and pathological stages of gastric cancer patients analyzed by GEPIA. (A) *CBX1*; (B) *CBX2*; (C) *CBX3*; (D) *CBX4*; (E) *CBX5*; (F) *CBX6*; (G) *CBX7*; (H) *CBX8*.**

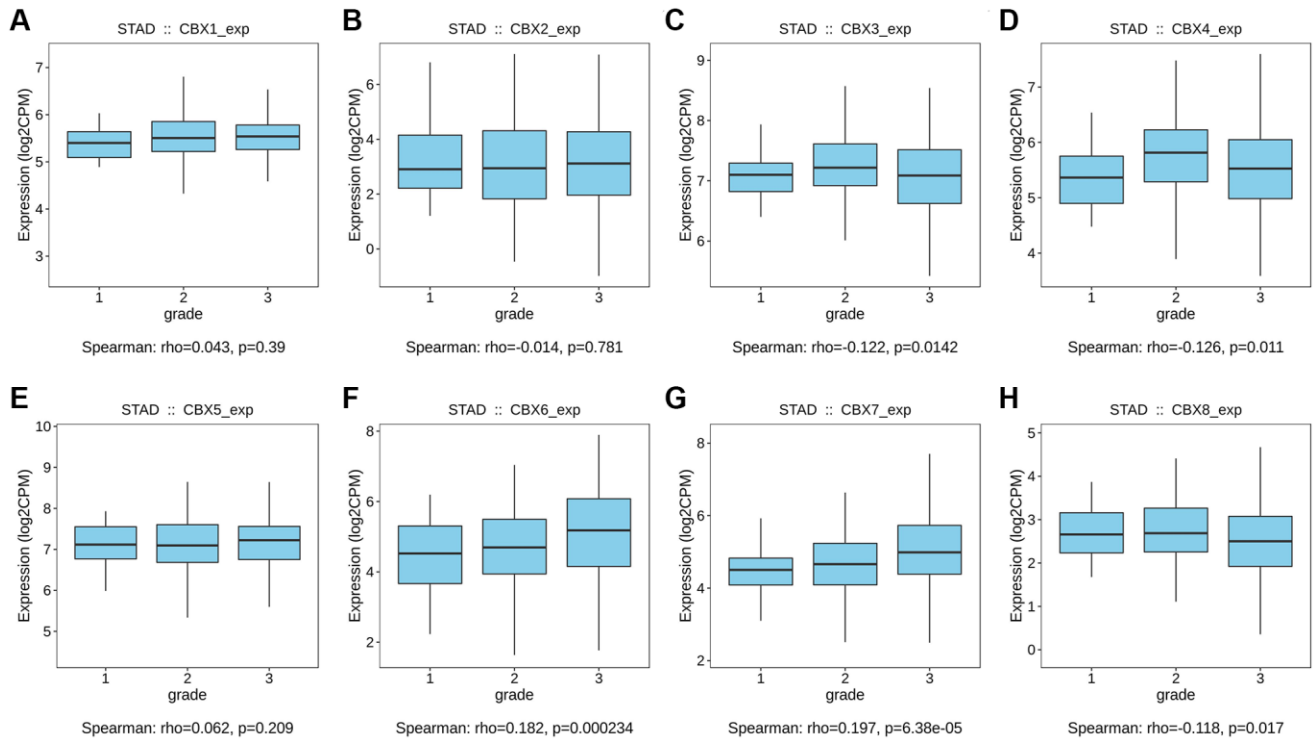

**Supplementary Figure 6. Spearman's correlation analysis of the CBXs expression and clinical grades in gastric cancer using the TISIDB database. (A) CBX1; (B) CBX2; (C) CBX3; (D) CBX4; (E) CBX5; (F) CBX6; (G) CBX7; (H) CBX8.**

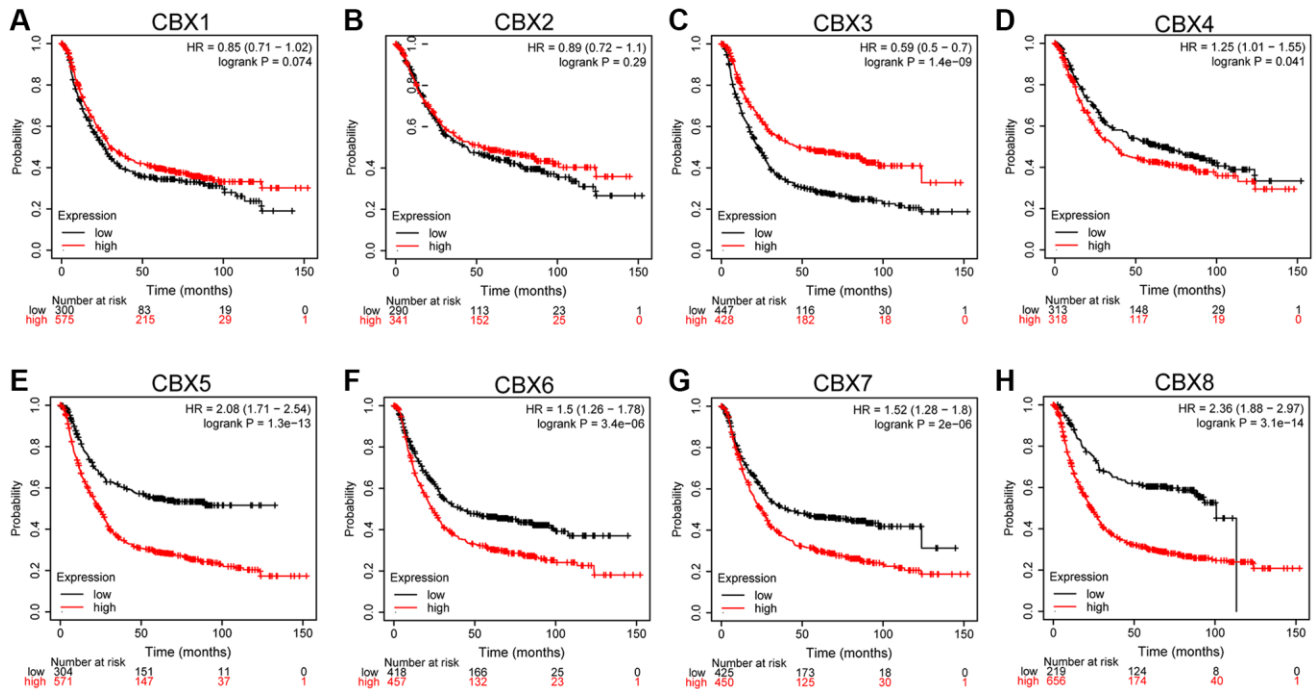

**Supplementary Figure 7. The overall survival rate of CBXs family members in gastric cancer patients using the microarray data. (A) CBX1; (B) CBX2; (C) CBX3; (D) CBX4; (E) CBX5; (F) CBX6; (G) CBX7; (H) CBX8.**



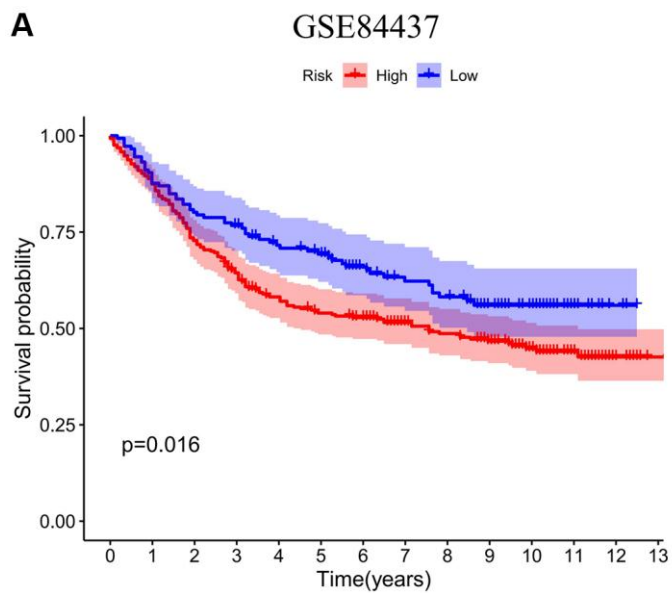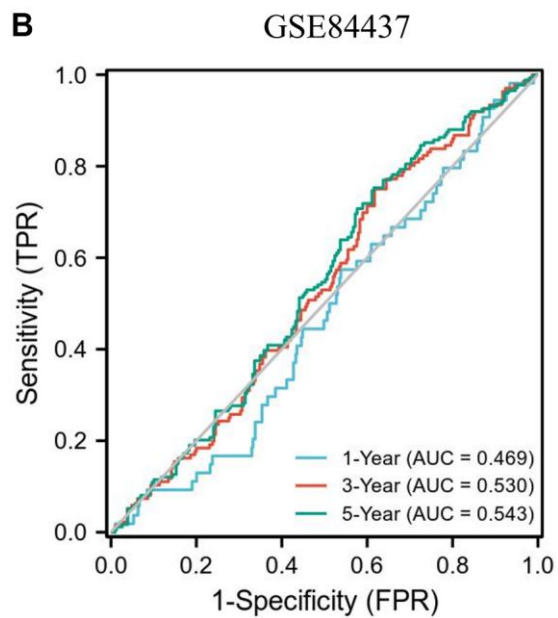

**Supplementary Figure 10. Validation of the CBXs prognostic model in GSE84437.** (A) Overall survival curves for gastric cancer patients in the high/low risk group. (B) The ROC curve of measuring the predictive value. Abbreviation: CBXs, chromobox proteins.

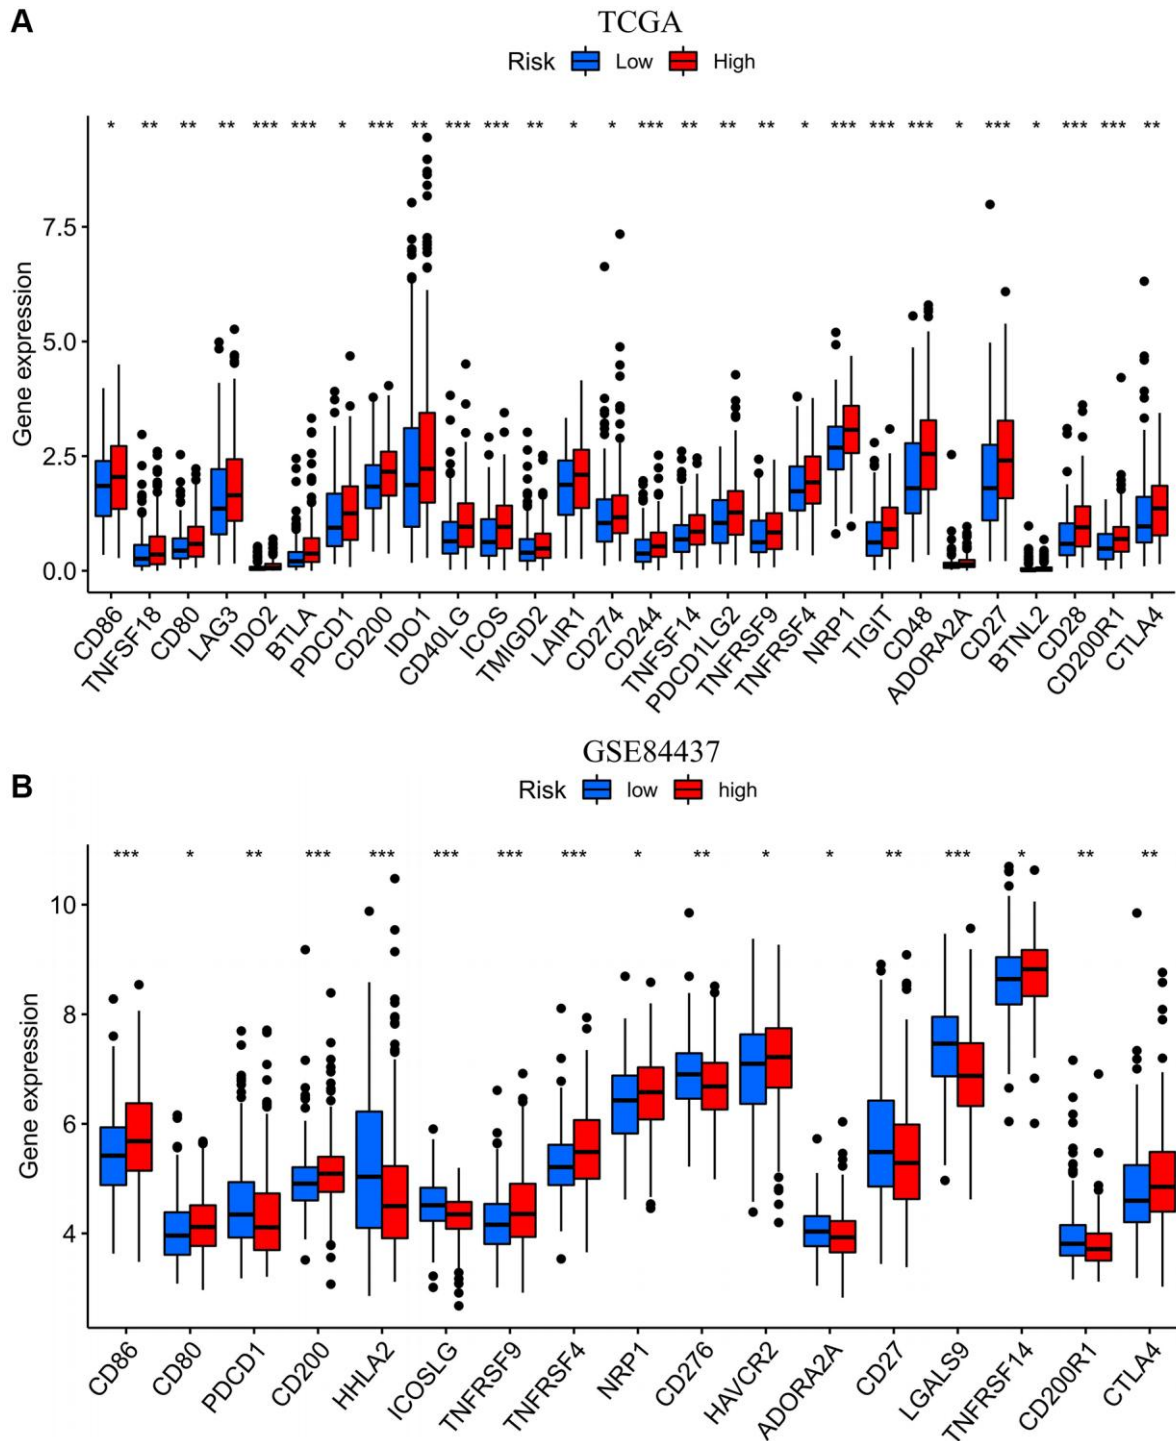

**Supplementary Figure 11. Correlation analysis between risk score and immune checkpoints.** Wilcox. test statistical analysis found significant differences in immune checkpoints between low and high risk score patients in TCGA-STAD (A) and GSE84437 (B) data sets. \* $p < 0.05$ ; \*\* $p < 0.01$ ; \*\*\* $p < 0.001$ .
