# Supplementary material for: CBXs-related prognostic gene signature correlates with immune microenvironment in gastric cancer
Source: publisher site journal article supplement (doi:10.18632/aging.204214), 2022-08-14
Supplement: Supplementary file [file aging-v14i15-204214-supplementary-material-SD2.pdf]

## SUPPLEMENTARY TABLES

**Supplementary Table 1. Significant changes of the mRNA levels of CBXs between gastric cancer and normal gastric tissues were analyzed by ONCOMINE.**

| Gene | Type                                   | Fold change | P-value  | References |
|------|----------------------------------------|-------------|----------|------------|
| CBX1 | Gastric Adenocarcinoma                 | 2.415       | 4.52E-06 | [2]        |
|      | Diffuse Gastric Adenocarcinoma         | 1.516       | 2.83E-08 | [1]        |
|      | Gastric Mixed Adenocarcinoma           | 1.66        | 2.25E-06 | [1]        |
|      | Gastric Intestinal Type Adenocarcinoma | 1.613       | 2.38E-13 | [1]        |
|      | Gastric Intestinal Type Adenocarcinoma | 2.116       | 2.21E-13 | [3]        |
| CBX2 | Diffuse Gastric Adenocarcinoma         | 2.29        | 6.01E-09 | [2]        |
|      | Gastric Mixed Adenocarcinoma           | 2.077       | 3.75E-04 | [2]        |
|      | Gastric Intestinal Type Adenocarcinoma | 4.485       | 1.70E-09 | [3]        |
| CBX3 | Gastric Intestinal Type Adenocarcinoma | 3.014       | 6.64E-14 | [3]        |
| CBX4 | Gastric Intestinal Type Adenocarcinoma | 1.783       | 2.55E-17 | [1]        |
|      | Gastric Mixed Adenocarcinoma           | 1.955       | 3.03E-06 | [1]        |
|      | Diffuse Gastric Adenocarcinoma         | 1.73        | 4.23E-04 | [1]        |
|      | Diffuse Gastric Adenocarcinoma         | 2.466       | 2.45E-05 | [3]        |
|      | Gastric Mixed Adenocarcinoma           | 3.314       | 2.29E-06 | [3]        |
|      | Gastric Mixed Adenocarcinoma           | 1.625       | 7.18E-04 | [2]        |
| CBX6 | Diffuse Gastric Adenocarcinoma         | 1.758       | 8.38E-05 | [1]        |
| CBX7 | Diffuse Gastric Adenocarcinoma         | -1.656      | 9.09E-05 | [2]        |

Abbreviation: CBXs: Chromobox proteins.

## REFERENCES

1. Chen X, Leung SY, Yuen ST, Chu KM, Ji J, Li R, Chan AS, Law S, Troyanskaya OG, Wong J, So S, Botstein D, Brown PO. Variation in gene expression patterns in human gastric cancers. *Mol Biol Cell*. 2003; 14:3208–15. <https://doi.org/10.1091/mbc.e02-12-0833>  
PMID:12925757
2. Cho JY, Lim JY, Cheong JH, Park YY, Yoon SL, Kim SM, Kim SB, Kim H, Hong SW, Park YN, Noh SH, Park ES, Chu IS, et al. Gene expression signature-based prognostic risk score in gastric cancer. *Clin Cancer Res*. 2011; 17:1850–7. <https://doi.org/10.1158/1078-0432.CCR-10-2180>  
PMID:21447720
3. D'Errico M, de Rinaldis E, Blasi MF, Viti V, Falchetti M, Calcagnile A, Sera F, Saieva C, Ottini L, Palli D, Palombo F, Giuliani A, Dogliotti E. Genome-wide expression profile of sporadic gastric cancers with microsatellite instability. *Eur J Cancer*. 2009; 45:461–9. <https://doi.org/10.1016/j.ejca.2008.10.032>  
PMID:19081245

**Supplementary Table 2. Drug targets of CBXs in gastric cancer (Enrichr).**

| <b>Term</b>                                                  | <b>Overlap</b> | <b>P-value</b> | <b>Odds ratio</b> | <b>Combined score</b> | <b>Genes</b> |
|--------------------------------------------------------------|----------------|----------------|-------------------|-----------------------|--------------|
| Prednisolone-184 mg/kg in Water-Rat-Heart-5d-up              | 3/257          | 0.005418       | 8.337966          | 43.50722              | CBX6         |
| Phenacetin-619 mg/kg in Corn Oil-Rat-Kidney-5d-up            | 3/260          | 0.005595       | 8.241758          | 42.74019              | CBX6         |
| Pramoxine-526 mg/kg in Corn Oil-Rat-Heart-1d-up              | 3/261          | 0.005655       | 8.210181          | 42.48917              | CBX6         |
| 44'-Methylenedianiline-81 mg/kg in Corn Oil-Rat-Kidney-5d-up | 3/261          | 0.005655       | 8.210181          | 42.48917              | CBX6         |
| Bromisovalum-250 mg/kg in Corn Oil-Rat-Kidney-5d-up          | 3/267          | 0.006022       | 8.025682          | 41.02991              | CBX6         |
| 6-Mercaptopurine-25 mg/kg in Corn Oil-Rat-Kidney-5d-up       | 3/269          | 0.006147       | 7.966012          | 40.56069              | CBX6         |
| Bromisovalum-250 mg/kg in Corn Oil-Rat-Kidney-1d-up          | 3/272          | 0.006338       | 7.878151          | 39.87225              | CBX6         |
| 2-Acetylaminofluorene-30 mg/kg in CMC-Rat-Kidney-3d-up       | 3/273          | 0.006403       | 7.849294          | 39.64677              | CBX6         |
| 123-Trichloropropane-108 mg/kg in CMC-Rat-Kidney-1d-up       | 3/274          | 0.006468       | 7.820647          | 39.42326              | CBX6         |
| Ascorbic Acid-2000 mg/kg in Water-Rat-Kidney-1d-up           | 3/279          | 0.006798       | 7.680492          | 38.33433              | CBX6         |

Abbreviation: CBXs: Chromobox proteins.

**Supplementary Table 3. microRNA targets of CBXs in gastric cancer (Enrichr).**

| <b>Term</b>     | <b>Overlap</b> | <b>P-value</b> | <b>Odds ratio</b> | <b>Combined score</b> | <b>Genes</b> |
|-----------------|----------------|----------------|-------------------|-----------------------|--------------|
| mmu-miR-493     | 10/1997        | 2.33E-04       | 3.576794          | 29.91359              | CBX2/5       |
| hsa-miR-1296    | 8/1377         | 4.43E-04       | 4.149808          | 32.04482              | CBX2/5/6     |
| mmu-miR-5128    | 7/1108         | 6.66E-04       | 4.512635          | 33.00666              | CBX1/2/4/7   |
| hsa-miR-2277-3p | 9/1993         | 0.001132       | 3.225575          | 21.88069              | CBX3/4/7     |
| mmu-miR-293     | 4/382          | 0.001866       | 7.479432          | 47.00003              | CBX6/7       |
| mmu-miR-2183    | 7/1335         | 0.001985       | 3.745318          | 23.30452              | CBX3/5/6     |
| mmu-miR-3099    | 7/1572         | 0.004978       | 3.180662          | 16.86609              | CBX6/7       |
| hsa-miR-4730    | 4/516          | 0.005485       | 5.537099          | 28.82443              | CBX2/4/5     |
| hsa-miR-566     | 5/877          | 0.006797       | 4.072324          | 20.32605              | CBX2/5/7     |
| mmu-miR-1306-5p | 7/1681         | 0.007174       | 2.97442           | 14.68542              | CBX7         |

Abbreviation: CBXs: Chromobox proteins.

**Supplementary Table 4. Transcriptional factor targets of CBXs in gastric cancer (Enrichr).**

| <b>Term</b>     | <b>Overlap</b> | <b>P-value</b> | <b>Odds ratio</b> | <b>Combined score</b> | <b>Genes</b>       |
|-----------------|----------------|----------------|-------------------|-----------------------|--------------------|
| TEAD4 (human)   | 10/1354        | 8.31E-06       | 5.275375          | 61.71111              | CBX2/6/7/8         |
| NRF1 (human)    | 9/1356         | 6.26E-05       | 4.740834          | 45.88685              | CBX1/2/5/7         |
| HINFP (human)   | 13/3047        | 9.07E-05       | 3.047494          | 28.36607              | CBX2/3/7           |
| WT1 (human)     | 12/2689        | 1.28E-04       | 3.18759           | 28.58052              | CBX2/3/6/7/8       |
| E2F1 (human)    | 15/4207        | 1.52E-04       | 2.546776          | 22.39494              | CBX1/2/3/4/5/6/7/8 |
| EGR1 (mouse)    | 8/1617         | 0.001284       | 3.533881          | 23.52762              | CBX2/3/7           |
| SP3 (human)     | 7/1332         | 0.001959       | 3.753754          | 23.40551              | CBX2/4/7/8         |
| PCBP1 (human)   | 7/1360         | 0.002207       | 3.676471          | 22.48527              | CBX2/4/7/8         |
| TCFAP2A (human) | 7/1367         | 0.002273       | 3.657644          | 22.26283              | CBX2/4/8           |

Abbreviation: CBXs: Chromobox proteins.
